# Supplementary material for: Enantiomerically pure zinc phosphonates based on mixed phosphonic acid–phosphine oxide chiral building blocks
Source: Royal Society of Chemistry journal article supplement (doi:10.1039/b007868i), 2001-01-01
Supplement: b007868i.doc [file b007868i.doc]

Authors : Florence Fredoueil, Michel Evain, Dominique Massiot,

Martine Bujoli-Doeuff, and Bruno Bujoli

Table S1. Main crystallographic data for (R )-?-Zn(O3PCH2P(O)(C2H5)(C6H5)).H2O

[?-Zn2-(R)].

______________________________________________________________________________

JRNL :1145,,,

______________________________________________________________________________

AUTHOR :F,Fredoueil,M.Evain,D.Massiot,M.Bujoli-Doeuff,B.Bujoli

______________________________________________________________________________

CELL DIMENSIONS AND VOLUME :

a 5.5106,7 b 8.922,1 c 13.306,2

alpha 90.43,2 beta 100.70,2 gamma 90.16,2 v 642.8

______________________________________________________________________________

SPACE GROUP :P1

______________________________________________________________________________

Z VALUE :2

______________________________________________________________________________

FORMULA :ZnP2O5C9H14

______________________________________________________________________________

FWEIGHT :329.54

______________________________________________________________________________

DENSITY :1.70

______________________________________________________________________________

R FACTOR :0.0403

______________________________________________________________________________

TEMP :298 K

______________________________________________________________________________

COLOUR :white

______________________________________________________________________________

Formula : ZnP2O5C9H14, M = 329.54, T = 298 K

Triclinic, colour : white

P 1 (No.1)

a = 5.5106(7) Å

b = 8.922(1) Å

c = 13.306(2) Å

alpha= 90.43(2) °

beta= 100.70(2) °

gamma= 90.16(2) °

V = 642.8(2) Å3, Z = 2

= 21.6 cm-1, ?calc. = 1.70 g cm-3

Crystal size : 0.30 x 0.08 x 0.008 mm

Graphite-monochromatized MoK-L2,3 radiation (? = 0.71073 Å)

Stoe IPDS diffractometer

Structure solution: direct methods and difference Fourier synthesis maps

Shelxtl V5.0 and JANA 2000 programs

3597 measured reflections, 1.56 < ? < 23.90°, R(int) = 0.049 (all)

2644 independent reflections (I > 2?(I)), refinement on F, 305 parameters

R(obs) = 0.0365, wRF(obs) = 0.0685, goodness of fit (all) = 0.75

F(000) = 332, residual electron density [-0.62/0.67]

R(Fo) = ???Fo ? - ?Fc??/??Fo? ; Rw(Fo) = [?w(?Fo ? - ?Fc?)2 / ?w(Fo2)]1/2 ;

w = 1 / (????????????????2?

Table S2. Positional Parameters and Thermal Parameters with esd’s for the Atoms

of (R )-?-Zn(O3PCH2P(O)(C2H5)(C6H5)).H2O

atom x y z Ueq,a Å2

Zna 0.2233 0.339 -0.03721 0.0222(5)

Znb 0.7712(3) 0.8357(2) 0.0373(1) 0.0212(5)

P(1)a -0.2763(5) 0.5078(3) -0.0556(2) 0.0214(9)

P(1)b 0.2725(5) 0.0076(3) 0.0559(2) 0.0216(9)

P(2)a -0.1798(6) 0.3074(3) -0.2316(2) 0.027(1)

P(2)b 0.1753(6) 0.8037(3) 0.2310(2) 0.025(1)

O(1)a -0.008(1) 0.4873(8) -0.0082(5) 0.034(3)

O(1)b 0.077(1) -0.0990(8) 0.0007(5) 0.039(3)

O(2)a 0.195(2) 0.1708(7) 0.0456(5) 0.047(3)

O(2)b -0.363(1) 0.6669(7) -0.0430(5) 0.039(3)

O(3)a -0.437(1) 0.3913(8) -0.0162(5) 0.036(3)

O(3)b 0.517(1) -0.0176(8) 0.0232(5) 0.037(3)

O(4)a 0.091(1) 0.2978(8) -0.1835(5) 0.026(3)

O(4)b -0.101(1) 0.7958(8) 0.1852(6) 0.032(3)

Owa -0.194(2) 0.221(1) 0.1808(6) 0.061(4)

Owb -0.815(2) 0.7298(9) -0.1811(6) 0.056(3)

C(10)a -0.312(2) 0.476(1) -0.1927(9) 0.028(4)

C(10)b 0.312(3) -0.028(1) 0.1934(9) 0.030(4)

C(20)a -0.352(3) 0.153(1) -0.2007(9) 0.033(4)

C(20)b 0.343(3) 0.648(1) 0.1974(9) 0.032(4)

C(21)a -0.251(3) 0.001(1) -0.2310(9) 0.048(3)

C(21)b 0.249(3) 0.496(1) 0.2301(9) 0.048(3)

C(30)a -0.213(3) 0.317(1) -0.3684(9) 0.030(4)

C(30)b 0.208(3) 0.813(1) 0.369(1) 0.035(5)

C(31)a -0.036(3) 0.399(2) -0.4089(9) 0.070(6)

C(31)b 0.400(2) 0.747(1) 0.4332(8) 0.054(5)

C(32)a -0.055(4) 0.406(3) -0.515(1) 0.10(1)

C(32)b 0.413(3) 0.753(2) 0.539(1) 0.072(7)

C(33)a -0.243(4) 0.329(3) -0.580(1) 0.09(1)

C(33)b 0.232(4) 0.831(2) 0.578(1) 0.081(9)

C(34)a -0.417(4) 0.254(2) -0.541(1) 0.083(8)

C(34)b 0.047(3) 0.903(2) 0.513(1) 0.096(9)

C(35)a -0.402(2) 0.246(1) -0.4362(8) 0.055(5)

C(35)b 0.037(3) 0.891(2) 0.410(1) 0.070(7)

H1C(10)a -0.492 0.474 -0.222 0.028(4)

H2C(10)a -0.232 0.562 -0.223 0.028(4)

H1C(10)b 0.493 -0.034 0.221 0.030(4)

H2C(10)b 0.239 0.058 0.225 0.030(4)

H1C(20)a -0.343 0.149 -0.125 0.033(4)

H2C(20)a -0.525 0.160 -0.237 0.033(4)

H1C(20)b 0.337 0.639 0.121 0.032(4)

H2C(20)b 0.524 0.651 0.232 0.032(4)

H1C(21)a -0.362(3) -0.074(1) -0.2004(9) 0.048(3)

H2C(21)a -0.067(3) -0.016(1) -0.1971(9) 0.048(3)

H3C(21)a -0.272(3) -0.016(1) -0.3095(9) 0.048(3)

H1C(21)b 0.330(3) 0.407(1) 0.1969(9) 0.048(3)

H2C(21)b 0.058(3) 0.489(1) 0.2082(9) 0.048(3)

H3C(21)b 0.297(3) 0.490(1) 0.3093(9) 0.048(3)

HC(31)a 0.102 0.447 -0.356 0.070(6)

HC(32)a 0.062 0.472 -0.552 0.10(1)

HC(33)a -0.250 0.298 -0.653 0.09(1)

HC(34)a -0.550 0.212 -0.598 0.083(8)

HC(35)a -0.535 0.193 -0.405 0.055(5)

HC(31)b 0.531 0.693 0.399 0.054(5)

HC(32)b 0.549 0.708 0.594 0.072(7)

HC(33)b 0.261 0.803 0.654 0.081(9)

HC(34)b -0.079 0.958 0.548 0.096(9)

HC(35)b -0.100 0.945 0.359 0.070(7)

aThe zinc, phosphorus, oxygen and carbon atoms were refined anisotropically and

are given in the

form of the equivalent displacement parameter defined as

Ueq = 1/3 ?i?jUijai*aj* ai aj

Table S3. Selected Bond Lengths (Å) and Angles (deg) for the Non-Hydrogen Atoms

of (R )-?-Zn(O3PCH2P(O)(C2H5)(C6H5)).H2O

Zna O(4)a 1.979(7)

Zna O(2)a 1.891(7)

Zna O(3)a 1.898(7)

Zna O(1)a 1.925(7)

Znb O(4)bc 1.998(7)

Znb O(2)bc 1.906(6)

Znb O(3)bd 1.904(7)

Znb O(1)be 1.928(8)

P(1)a O(1)a 1.510(7)

P(1)a O(2)b 1.516(7)

P(1)a O(3)a 1.521(8)

P(1)a C(10)a 1.82(1)

P(1)b O(1)b 1.516(7)

P(1)b O(2)a 1.518(7)

P(1)b O(3)b 1.508(8)

P(1)b C(10)b 1.83(1)

P(2)a O(4)a 1.514(8)

P(2)a C(10)a 1.79(1)

P(2)a C(20)a 1.76(1)

P(2)a C(30)a 1.80(1)

P(2)b O(4)b 1.531(8)

P(2)b C(10)b 1.79(1)

P(2)b C(20)b 1.77(1)

P(2)b C(30)b 1.82(1)

C(20)a C(21) 1.55(2)

C(20)b C(21)b 1.55(2)

C Cf 1.38(2)

#IGNORE

O(4)a-Zna-O(2)a

O(4)a-Zna-O(3)ac

O(4)a-Zna-O(1)a

O(2)a-Zna-O(3)ac

O(2)a-Zna-O(1)a

O(3)ac-Zna-O(1)a

O(4)bc-Znb-O(2)bc

O(4)bc-Znb-O(3)bd

O(4)bc-Znb-O(1)be

112.1(3)

111.1(3)

100.5(3)

107.0(3)

107.6(3)

118.4(3)

115.8(3)

110.2(3)

98.0(3)

O(3)a-P(1)a-O(1)a

O(3)a-P(1)a-O(2)b

O(3)a-P(1)a-C(10)a

O(1)a-P(1)a-O(2)b

O(1)a-P(1)a-C(10)a

O(2)b-P(1)a-C(10)a

O(3)b-P(1)b-O(1)b

O(3)b-P(1)b-O(2)a

O(3)b-P(1)b-C(10)b

110.9(4)

112.8(4)

106.6(5)

112.1(4)

108.4(5)

105.7(4)

111.2(4)

111.6(5)

108.3(5)

O(2)bc-Znb-O(3)bd

O(2)bc-Znb-O(1)be

O(3)bd-Znb-O(1)be

106.6(3)

111.2(3)

115.3(3)

O(1)b-P(1)b-O(2)a

O(1)b-P(1)b-C(10)b

O(2)a-P(1)b-C(10)b

113.0(4)

108.3(5)

104.1(5)

O(4)a-P(2)a-C(10)ad

O(4)a-P(2)a-C(20)a

O(4)a-P(2)a-C(30)a

C(10)a-P(2)a-C(20)a

C(10)a-P(2)a-C(30)a

C(20)a-P(2)a-C(30)a

O(4)b-P(2)b-C(10)b

O(4)b-P(2)b-C(20)b

O(4)b-P(2)b-C(30)b

110.6(5)

112.6(5)

109.8(6)

108.9(6)

106.1(6)

108.7(6)

111.1(5)

113.2(5)

108.0(6)

C(10)b-P(2)b-C(20)b

C(10)b-P(2)b-C(30)b

C(20)b-P(2)b-C(30)b

P(1)a-C(10)a-P(2)a

P(1)b-C(10)b-P(2)b

P(2)a-C(20)a-C(21)a

P(2)b-C(20)bC(21)b

C - C - C f

108.8(6)

106.5(6)

109.1(6)

116.1(6)

116.9(6)

113(1)

114(1)

120(1)

cAtom related by 1+x, y, z ; d x, 1+y, z ; e 1+x, 1+y, z ; f phenyl ring

average value.

Table S4. Anisotropic thermal parameters for the non-hydrogen atoms of

(R )-?-Zn(O3PCH2P(O)(C2H5)(C6H5)).H2O

Atom U(1,1) U(2,2) U(3,3) U(1,2) U(1,3) U(2,3)

Zna 0.017(1) 0.0223(7) 0.0278(8) 0.0020(6) 0.0049(6) 0.0011(5)

Znb 0.015(1) 0.0212(7) 0.0273(8) 0.0002(6) 0.0045(6) -0.0003(5)

P(1)a 0.019(2) 0.020(1) 0.025(1) 0.001(1) 0.004(1) -0.003(1)

P(1)b 0.018(2) 0.020(1) 0.028(1) 0.001(1) 0.006(1) 0.003(1)

P(2)a 0.024(2) 0.032(2) 0.025(2) 0.006(1) 0.005(1) -0.002(1)

P(2)b 0.023(2) 0.032(2) 0.020(1) -0.003(1) 0.002(1) 0.006(1)

O(1)a 0.031(5) 0.038(4) 0.033(4) 0.012(3) 0.005(3) -0.004(3)

O(1)b 0.032(5) 0.056(5) 0.027(4) -0.011(4) 0.004(3) -0.002(3)

O(2)a 0.076(7) 0.022(4) 0.050(5) 0.014(4) 0.028(4) 0.015(3)

O(2)b 0.047(5) 0.016(4) 0.046(4) 0.009(3) -0.007(3) -0.009(3)

O(3)a 0.029(5) 0.050(4) 0.027(4) -0.005(4) 0.003(3) 0.001(3)

O(3)b 0.028(5) 0.035(4) 0.048(5) 0.013(3) 0.004(3) 0.005(3)

O(4)a 0.020(5) 0.035(4) 0.024(4) 0.001(4) 0.003(3) -0.001(3)

O(4)b 0.022(5) 0.040(5) 0.034(4) -0.001(4) 0.008(3) 0.018(4)

Owa 0.058(6) 0.075(7) 0.049(5) -0.005(5) 0.011(4) 0.000(4)

Owb 0.051(6) 0.075(6) 0.043(5) 0.018(5) 0.006(4) 0.002(4)

C(10)a 0.028(8) 0.024(6) 0.032(6) 0.006(5) 0.006(5) 0.000(5)

C(10)b 0.027(8) 0.026(6) 0.037(7) -0.007(6) 0.005(6) -0.002(5)

C(20)a 0.038(9) 0.026(6) 0.036(7) 0.005(6) 0.007(6) 0.003(5)

C(20)b 0.032(8) 0.038(7) 0.022(6) -0.005(6) -0.002(5) 0.001(5)

C(21)a 0.068(7) 0.028(4) 0.046(5) 0.002(4) 0.005(4) 0.000(4)

C(21)b 0.065(6) 0.030(4) 0.047(5) -0.007(4) 0.003(4) 0.004(4)

C(30)a 0.030(9) 0.033(6) 0.024(6) 0.004(6) 0.000(6) 0.002(5)

C(30)b 0.023(9) 0.050(8) 0.032(7) -0.008(6) 0.008(6) -0.003(6)

C(31)a 0.05(1) 0.12(1) 0.035(8) -0.022(9) 0.001(7) 0.025(8)

C(31)b 0.06(1) 0.066(8) 0.032(7) 0.015(7) -0.006(6) 0.009(6)

C(32)a 0.06(1) 0.21(2) 0.05(1) 0.00(1) 0.032(9) 0.03(1)

C(32)b 0.09(1) 0.09(1) 0.026(8) 0.000(9) -0.020(7) 0.007(7)

C(33)a 0.08(2) 0.15(2) 0.05(1) 0.05(2) -0.01(1) 0.00(1)

C(33)b 0.11(2) 0.12(2) 0.021(9) -0.04(1) 0.02(1) -0.002(9)

C(34)a 0.10(2) 0.10(1) 0.04(1) 0.01(1) -0.025(9) -0.014(8)

C(34)b 0.08(1) 0.18(2) 0.036(9) 0.02(1) 0.028(8) -0.02(1)

C(35)a 0.06(1) 0.069(9) 0.025(6) -0.008(7) -0.013(6) 0.003(6)

C(35)b 0.04(1) 0.13(1) 0.041(9) 0.016(9) 0.008(6) 0.000(8)

The form of the anisotropic displacement parameter is:

exp[-2?2{h2a2U(1,1) + k2b2U(2,2) + l2c2U(3,3) +

2hkabU(1,2) + 2hlacU(1,3) + 2klbcU(1,1)}] where a, b, and c are reciprocal

lattice constants.

#CONTINUE

#END

Table S5. Main crystallographic data for (R )-?-Zn(O3PCH2P(O)(CH3)(C6H5))

______________________________________________________________________________

JRNL :1145,,,

______________________________________________________________________________

AUTHOR :F,Fredoueil,M.Evain,D.Massiot,M.Bujoli-Doeuff,B.Bujoli

______________________________________________________________________________

CELL DIMENSIONS AND VOLUME :

a 5.5038,3 b 8.9927,6 c 21.187,1 v 1048.6

______________________________________________________________________________

SPACE GROUP :P212121

______________________________________________________________________________

Z VALUE :4

______________________________________________________________________________

FORMULA :ZnP2O4C8H10

______________________________________________________________________________

FWEIGHT :297.50

______________________________________________________________________________

DENSITY :1.88

______________________________________________________________________________

R FACTOR :0.0224

______________________________________________________________________________

TEMP :298 K

______________________________________________________________________________

COLOUR :white

______________________________________________________________________________

Formula : ZnP2O4C8H10, M = 297.50, T = 298 K

Orthorhombic, colour : white

P 21 21 21 (No.19)

a = 5.5038(3) Å

b = 8.9927(6) Å

c = 21.187(1) Å

V = 1048.6(1) Å3, Z = 4

= 26.4 cm-1, ?calc. = 1.88 g cm-3

Crystal size : 0.32 x 0.14 x 0.14 mm

Graphite-monochromatized MoK-L2,3 radiation (? = 0.71073 Å)

Stoe IPDS diffractometer

Structure solution: direct methods and difference Fourier synthesis maps

Shelxtl V5.0 and JANA 2000 programs

2466 measured reflections, 2.46 < ? < 27.82°, R(int) = 0.040 (all)

2197 independent reflections (I > 2?(I)), refinement on F, 176 parameters

R(obs) = 0.0224, wRF(obs) = 0.0418, goodness of fit (all) = 0.86

F(000) = 600, residual electron density [-0.34/0.48]

R(Fo) = ???Fo ? - ?Fc??/??Fo? ; Rw(Fo) = [?w(?Fo ? - ?Fc?)2 / ?w(Fo2)]1/2 ;

w = 1 / (????????????????2?

Table S6. Positional Parameters and Thermal Parameters with esd’s for the

Atoms of (R )-?-Zn(O3PCH2P(O)(CH3)(C6H5))

atom x y z Ueq,a Å2

Zn 0.82937(5) 0.81028(3) 0.72430(1) 0.01617(7)

P(1) 0.3341(1) 0.97033(7) 0.74693(3) 0.0146(2)

P(2) 0.5150(1) 0.90490(8) 0.61299(3) 0.0172(2)

O(1) 0.1569(4) 0.8412(2) 0.74803(8) 0.0228(5)

O(2) 0.5822(3) 0.9210(2) 0.76950(9) 0.0206(5)

O(3) 0.2418(3) 1.1026(2) 0.78312(9) 0.0271(6)

O(4) 0.7725(3) 0.8786(2) 0.63532(9) 0.0220(6)

C(10) 0.3637(5) 1.0323(3) 0.6650(1) 0.0197(8)

C(20) 0.3383(7) 0.7399(3) 0.6091(1) 0.0254(8)

C(30) 0.5256(5) 0.9847(3) 0.5352(1) 0.0203(8)

C(31) 0.3481(7) 0.9559(4) 0.4906(1) 0.032(1)

C(32) 0.3652(7) 1.0159(4) 0.4306(1) 0.040(1)

C(33) 0.5557(7) 1.1031(4) 0.4151(2) 0.038(1)

C(34) 0.7335(7) 1.1346(4) 0.4588(2) 0.039(1)

C(35) 0.7190(6) 1.0737(3) 0.5188(1) 0.0296(9)

H1(C10) 0.206(6) 1.045(3) 0.648(1) 0.023(8)

H2(C10) 0.460(6) 1.115(3) 0.662(1) 0.025(8)

H1(C20) 0.362(7) 0.692(4) 0.645(2) 0.042(9)

H2(C20) 0.408(5) 0.675(4) 0.575(2) 0.036(9)

H3(C20) 0.183(8) 0.769(4) 0.601(2) 0.05(1)

H(C31) 0.241(6) 0.895(4) 0.500(2) 0.04(1)

H(C32) 0.251(6) 0.996(4) 0.399(2) 0.036(9)

H(C33) 0.559(7) 1.142(4) 0.381(2) 0.06(1)

H(C34) 0.876(7) 1.179(4) 0.447(2) 0.04(1)

H(C35) 0.833(6) 1.095(3) 0.549(2) 0.028(8)

aThe zinc, phosphorus, oxygen and carbon atoms were refined anisotropically

and are given in the

form of the equivalent displacement parameter defined as

Ueq = 1/3 ?i?jUijai*aj* ai aj

Table S7. Selected Bond Lengths (Å) and Angles (deg) for the Non-Hydrogen Atoms

of (R )-?-Zn(O3PCH2P(O)(CH3)(C6H5))

Zn O(1)a 1.892(2)

P(1) C(10) 1.830(3)

Zn O(2) 1.939(2)

P(2) O(4) 1.513(2)

Zn O(3)b 1.914(2)

P(2) C(10) 1.794(3)

Zn O(4) 2.007(2)

P(2) C(20) 1.776(3)

P(1) O(1) 1.517(2)

P(2) C(30) 1.799(3)

P(1) O(2) 1.513(2)

C Cg 1.37(1)

P(1) O(3) 1.504(2)

#IGNORE

O(1)a-Zn-O(2) 117.50(8)

O(3)-P(1)-C(10) 105.8(1)

O(1)a-Zn-O(3)b 111.11(8)

O(4)-P(2)-C(10) 110.0(1)

O(1)a-Zn-O(4) 110.69(7)

O(4)-P(2)-C(20) 113.4(1)

O(2)-Zn-O(3)b 113.45(8)

O(4)-P(2)-C(30) 108.6(1)

O(2)-Zn-O(4) 101.38(8)

C(10)-P(2)-C(20) 107.9(1)

O(3)b-Zn-O(4) 100.91(8)

C(10)-P(2)-C(30) 108.9(1)

O(1)-P(1)-O(2) 110.6(1)

C(20)-P(2)-C(30) 108.0(1)

O(1)-P(1)-O(3) 112.4(1)

P(1)-C(10)-P(2) 115.5(2)

O(1)-P(1)-C(10) 107.8(1)

P(2)-C(30)-C(31) 121.9(2)

O(2)-P(1)-O(3) 112.1(1)

P(2)-C(30)-C(35) 119.2(2)

O(2)-P(1)-C(10) 108.0(1)

C-C-Cc 120(1)

aAtom related by 1+x, y, z ; b 1-x, -1/2+y, 3/2-z ; c phenyl ring average value.

Table S8. Anisotropic thermal parameters for the non-hydrogen atoms of

(R )-?-Zn(O3PCH2P(O)(CH3)(C6H5))

Atom U(1,1) U(2,2) U(3,3) U(1,2) U(1,3) U(2,3)

Zn 0.0126(1) 0.0181(1) 0.0178(1) -0.0015(1) -0.0008(1) 0.0024(1)

P(1) 0.0130(3) 0.0157(3) 0.0151(3) 0.0016(3) 0.000(3) -0.0011(2)

P(2) 0.0172(3) 0.0205(3) 0.0139(3) 0.0014(3) 0.0000(3) 0.0005(3)

O(1) 0.0160(8) 0.024(1) 0.0284(9) -0.0041(9) -0.0029(8) 0.0038(7)

O(2) 0.0137(8) 0.030(1) 0.0178(9) 0.0030(7) -0.0005(7) -0.0043(8)

O(3) 0.038(1) 0.0188(9) 0.025(1) 0.0083(8) 0.0047(8) -0.0033(8)

O(4) 0.020(1) 0.031(1) 0.0154(9) 0.0018(8) 0.0008(7) 0.0044(8)

C(10) 0.020(2) 0.021(1) 0.018(1) 0.002(1) 0.002(1) 0.001(1)

C(20) 0.028(2) 0.023(1) 0.026(1) -0.002(1) 0.001(2) -0.003(1)

C(30) 0.023(1) 0.024(1) 0.014(1) 0.004(1) 0.001(1) 0.000(1)

C(31) 0.030(2) 0.044(2) 0.023(2) -0.008(2) -0.003(1) 0.004(1)

C(32) 0.047(2) 0.056(2) 0.018(1) -0.002(2) -0.010(1) 0.004(1)

C(33) 0.055(2) 0.038(2) 0.021(2) 0.004(2) 0.004(2) 0.007(1)

C(34) 0.042(2) 0.036(2) 0.037(2) -0.004(2) 0.006(1) 0.010(1)

C(35) 0.031(2) 0.030(2) 0.027(2) -0.005(1) -0.004(1) 0.003(1)

The form of the anisotropic displacement parameter is:

exp[-2?2{h2a2U(1,1) + k2b2U(2,2) + l2c2U(3,3) +

2hkabU(1,2) + 2hlacU(1,3) + 2klbcU(1,1)}] where a, b, and c are reciprocal

lattice constants.

#CONTINUE

#END

Table S9. Main crystallographic data for (R )-?-Zn(O3PCH2P(O)(CH3)(C6H5)).H2O

[?-Zn1-(R)].

______________________________________________________________________________

JRNL :1145,,,

______________________________________________________________________________

AUTHOR :F,Fredoueil,M.Evain,D.Massiot,M.Bujoli-Doeuff,B.Bujoli

______________________________________________________________________________

CELL DIMENSIONS AND VOLUME :

a 9.293,2 b 6.2124,7 c 19.321,3 beta 92.68,2 v 1114.2

______________________________________________________________________________

SPACE GROUP :C2

______________________________________________________________________________

Z VALUE :4

______________________________________________________________________________

FORMULA :ZnP2O5C8H12

______________________________________________________________________________

FWEIGHT :315.52

______________________________________________________________________________

DENSITY :1.79

______________________________________________________________________________

R FACTOR :0.0356

______________________________________________________________________________

TEMP :120 K

______________________________________________________________________________

COLOUR :white

______________________________________________________________________________

Formula : ZnP2O5C8H12, M = 315.52, T = 120 K

Monoclinic, colour : white

C 2 (No.5)

a = 9.293(2) Å

b = 6.2124(7) Å

c = 19.321(3) Å

alpha= 90 °

beta= 92.68(2) °

gamma= 90 °

V = 1114.2(3) Å3, Z = 4

= 24.8 cm-1, ?calc. = 1.79 g cm-3

Crystal size : 0.52 x 0.11 x 0.008 mm

Graphite-monochromatized MoK-L2,3 radiation (? = 0.71073 Å)

Stoe IPDS diffractometer

Structure solution: direct methods and difference Fourier synthesis maps

Shelxtl V5.0 and JANA 2000 programs

2553 measured reflections, 2.11 < ? < 27.75°, R(int) = 0.074 (all)

1851 independent reflections (I > 2?(I)), refinement on F, 112 parameters

R(obs) = 0.0356, wRF(obs) = 0.0632, goodness of fit (all) = 0.92

F(000) = 640, residual electron density [-0.92/0.74]

R(Fo) = ???Fo ? - ?Fc??/??Fo? ; Rw(Fo) = [?w(?Fo ? - ?Fc?)2 / ?w(Fo2)]1/2 ;

w = 1 / (????????????????2?

Table S10. Positional Parameters and Thermal Parameters with esd’s for the

Atoms of (R )-?-Zn(O3PCH2P(O)(CH3)(C6H5)).H2O.

atom x y z Ueq,a Å2

Zn(1) 0.5 0.244639 0 0.0043(3)

Zn(2) 0.5 -0.2478(2) 0 0.0044(3)

P(1) 0.2520(1) -0.0023(6) 0.08424(5) 0.0039(3)

P(2) 0.1460(2) -0.1096(4) 0.22491(7) 0.0086(4)

O(1) 0.1686(5) -0.2067(9) 0.0684(2) 0.004(1)

O(2) 0.3994(3) 0.001(1) 0.0506(1) 0.0053(6)

O(3) 0.1681(5) 0.204(1) 0.0696(2) 0.010(1)

O(4) 0.0004(3) -0.0255(9) 0.2017(1) 0.0106(7)

O(w) 0.4034(3) 0.498(1) 0.0652(2) 0.0059(6)

C(10) 0.2936(4) -0.010(2) 0.1773(2) 0.0069(8)

C(20) 0.1605(8) -0.398(1) 0.2230(3) 0.014(1)

C(30a) 0.193(1) -0.042(2) 0.3147(3) 0.012(1)

C(31a) 0.100(2) 0.094(5) 0.3494(9) 0.020(2)

C(32a) 0.138(4) 0.161(7) 0.417(1) 0.023(2)

C(33a) 0.265(4) 0.096(6) 0.448(1) 0.021(2)

C(34a) 0.358(3) -0.039(7) 0.415(1) 0.019(2)

C(35a) 0.323(2) -0.102(5) 0.347(1) 0.020(2)

C(30b) 0.180(1) -0.024(2) 0.3157(3) 0.012(1)

C(31b) 0.074(3) -0.080(5) 0.3613(9) 0.020(2)

C(32b) 0.091(4) -0.022(6) 0.431(1) 0.023(2)

C(33b) 0.210(4) 0.091(6) 0.454(1) 0.021(2)

C(34b) 0.317(4) 0.146(6) 0.410(1) 0.019(2)

C(35b) 0.299(3) 0.094(5) 0.340(1) 0.020(2)

H1(Ow) 0.313(5) 0.52(1) 0.065(2) 0.0059(6)

H2(Ow) 0.437(5) 0.48(1) 0.107(2) 0.0059(6)

H1(C10) 0.386(6) -0.11(1) 0.186(2) 0.0069(8)

H2(C10) 0.321(6) 0.135(9) 0.195(3) 0.0069(8)

H1(C20) 0.261(6) -0.44(1) 0.234(3) 0.014(1)

H2(C20) 0.102(6) -0.45(1) 0.258(2) 0.014(1)

H3(C20) 0.136(6) -0.44(1) 0.172(2) 0.014(1)

H(C31a) 0.016(1) 0.162(2) 0.3229(3) 0.020(2)

H(C32a) 0.081(1) 0.285(2) 0.4378(3) 0.023(2)

H(C33a) 0.287(1) 0.154(2) 0.4952(3) 0.021(2)

H(C34a) 0.437(1) -0.110(2) 0.4431(3) 0.019(2)

H(C35a) 0.387(1) -0.208(2) 0.3253(3) 0.020(2)

H(C31b) -0.021(1) -0.139(2) 0.3422(3) 0.020(2)

H(C32b) 0.004(1) -0.032(2) 0.4616(3) 0.023(2)

H(C33b) 0.213(1) 0.132(2) 0.5036(3) 0.021(2)

H(C34b) 0.411(1) 0.196(2) 0.4305(3) 0.019(2)

H(C35b) 0.380(1) 0.125(2) 0.3096(3) 0.020(2)

aThe zinc and phosphorus atoms were refined anisotropically and are given in

the form of the

equivalent displacement parameter defined as Ueq = 1/3 ?i?jUijai*aj* ai aj.

A disorder in the position

of the phenyl rings was observed, according to two main orientation (a and b)

tilted one to another by

90°. The occupation ratio was refined to 0.51 and 0.49 for the C(a) and C(b)

carbon atoms respectively.

Table S11. Selected Bond Lengths (Å) and Angles (deg) for the Non-Hydrogen

Atoms of (R )-?-

Zn(O3PCH2P(O)(CH3)(C6H5)).H2O.

Zn(1) O(w) 2.229(6)

Zn(2) O(3)g 2.036(4)

Zn(1) O(w)a 2.229(6)

P(1) O(1) 1.511(6)

Zn(1) O(2) 2.051(6)

P(1) O(2) 1.544(3)

Zn(1) O(2)a 2.051(6)

P(1) O(3) 1.518(7)

Zn(1) O(1)b 2.025(4)

P(1) C(10) 1.822(4)

Zn(1) O(1)c 2.025(4)

P(2) O(4) 1.499(4)

Zn(2) O(w)d 2.236(6)

P(2) C(10) 1.798(5)

Zn(2) O(w)e 2.236(6)

P(2) C(20) 1.79(1)

Zn(2) O(2) 2.074(6)

P(2) C(30a) 1.819(7)

Zn(2) O(2)a 2.074(6)

P(2) C(30b) 1.845(7)

Zn(2) O(3)f 2.036(4)

C Ch 1.39(4)

#IGNORE

O(w)-Zn(1)-O(w)a 90.3(2)

O(4)e-Zn(2)-O(3)g 80.7(2)

O(w)-Zn(1)-O(2) 92.7(2)

O(2)-Zn(2)-O(2)a 83.7(2)

O(w)-Zn(1)-O(2)a 173.9(1)

O(2)-Zn(2)-O(3)f 98.5(2)

O(w)-Zn(1)-O(1)b 81.1(2)

O(2)-Zn(2)-O(3)g 94.2(2)

O(w)-Zn(1)-O(1)c 86.8(2)

O(2)a-Zn(2)-O(3)f 94.2(2)

O(w)a-Zn(1)-O(2) 173.9(1)

O(2)a-Zn(2)-O(3)g 98.5(2)

O(w)a-Zn(1)-O(2)a 92.7(2)

O(3)f-Zn(2)-O(3)g 163.0(3)

O(w)a-Zn(1)-O(1)b 86.8(2)

O(2)-P(1)-O(3) 111.7(4)

O(w)a-Zn(1)-O(1)c 81.1(2)

O(2)-P(1)-O(1) 112.5(4)

O(2)-Zn(1)-O(2)a 84.8(2)

O(2)-P(1)-C(10) 105.4(2)

O(2)-Zn(1)-O(1)b 98.9(2)

O(3)-P(1)-O(1) 114.6(3)

O(2)-Zn(1)-O(1)c 93.7(2)

O(3)-P(1)-C(10) 106.8(4)

O(2)a-Zn(1)-O(1)b 93.7(2)

O(1)-P(1)-C(10) 105.2(4)

O(2)a-Zn(1)-O(1)c 98.9(2)

O(4)-P(2)-C(10) 115.2(3)

O(1)b-Zn(1)-O(1)c 162.8(2)

O(4)-P(2)-C(20) 114.1(3)

O(4)d-Zn(2)-O(4)e 90.0(2)

C(10)-P(2)-C(20) 105.9(4)

O(4)d-Zn(2)-O(2) 93.4(2)

C(10)-P(2)-C(30a) 104.7(4)

O(4)d-Zn(2)-O(2)a 173.7(1)

C(20)-P(2)-C(30a) 103.6(4)

O(4)d-Zn(2)-O(3)f 80.7(2)

C(10)-P(2)-C(30b) 106.6(4)

O(4)d-Zn(2)-O(3)g 87.2(2)

C(20)-P(2)-C(30b) 107.2(4)

O(4)e-Zn(2)-O(2) 173.7(1)

P(1)-C(10)-P(2) 112.5(3)

O(4)e-Zn(2)-O(2)a 93.4(2)

C -C -Ch 120(2)

O(4)e-Zn(2)-O(3)f 87.2(2)

aAtom related by 1-x, y, -z ; b 1/2+x, 1/2+y, z ; c 1/2-x, 1/2+y, -z ;

d x, -1+y, z ; e 1-x,

-1+y, -z ; f 1/2+x, -1/2+y, z ; g 1/2-x, -1/2+y, -z ; h phenyl ring average

value.

Table S12. Anisotropic thermal parameters for the non-hydrogen atoms of

(R )-?-Zn(O3PCH2P(O)(CH3)(C6H5)).H2O.

Atom U(1,1) U(2,2) U(3,3) U(1,2) U(1,3) U(2,3)

Zn(1) 0.0025(5) 0.0029(7) 0.0076(5) 0 0.0004(4) 0

Zn(2) 0.0027(5) 0.0022(7) 0.0082(5) 0 0.0001(4) 0

P(1) 0.0016(5) 0.0043(6) 0.0058(4) 0.001(1) 0.0012(3) -0.001(1)

P(2) 0.0039(6) 0.0147(9) 0.0073(6) 0.0000(6) 0.0016(5) 0.0011(6)

The form of the anisotropic displacement parameter is:

exp[-2?2{h2a2U(1,1) + k2b2U(2,2) +

l2c2U(3,3) + 2hkabU(1,2) + 2hlacU(1,3) + 2klbcU(1,1)}] where a, b, and c

are reciprocal lattice constants.
